# Supplementary material for: Silver Nanoparticles Agglomerate Intracellularly Depending on the Stabilizing Agent: Implications for Nanomedicine Efficacy
Source: PubMed Central journal article supplement (PMC7601179; doi:10.3390/nano10101953), 2020-09-30
Supplement: nanomaterials-10-01953-s001.pdf [file nanomaterials-10-01953-s001.pdf]

# Supplementary Materials

## Silver Nanoparticles Agglomerate Intracellularly Depending on the Stabilizing Agent: Implications for Nanomedicine Efficacy

Marina R. Mulenós, Henry Lujan, Lauren R. Pitts and Christie M. Sayes\*

<sup>1</sup> Department of Environmental Science, Baylor University, Waco, TX, 76798-7266, United States

[Marina\\_George@baylor.edu](mailto:Marina_George@baylor.edu) (M.R.M.); [Henry\\_Lujan@baylor.edu](mailto:Henry_Lujan@baylor.edu) (H.L.); [Lauren\\_Pitts@baylor.edu](mailto:Lauren_Pitts@baylor.edu) (L.R.P.)

\* Correspondence: [christie\\_sayes@baylor.edu](mailto:christie_sayes@baylor.edu); Tel: 1-254-710-3469; Fax: 1-254-710-3409

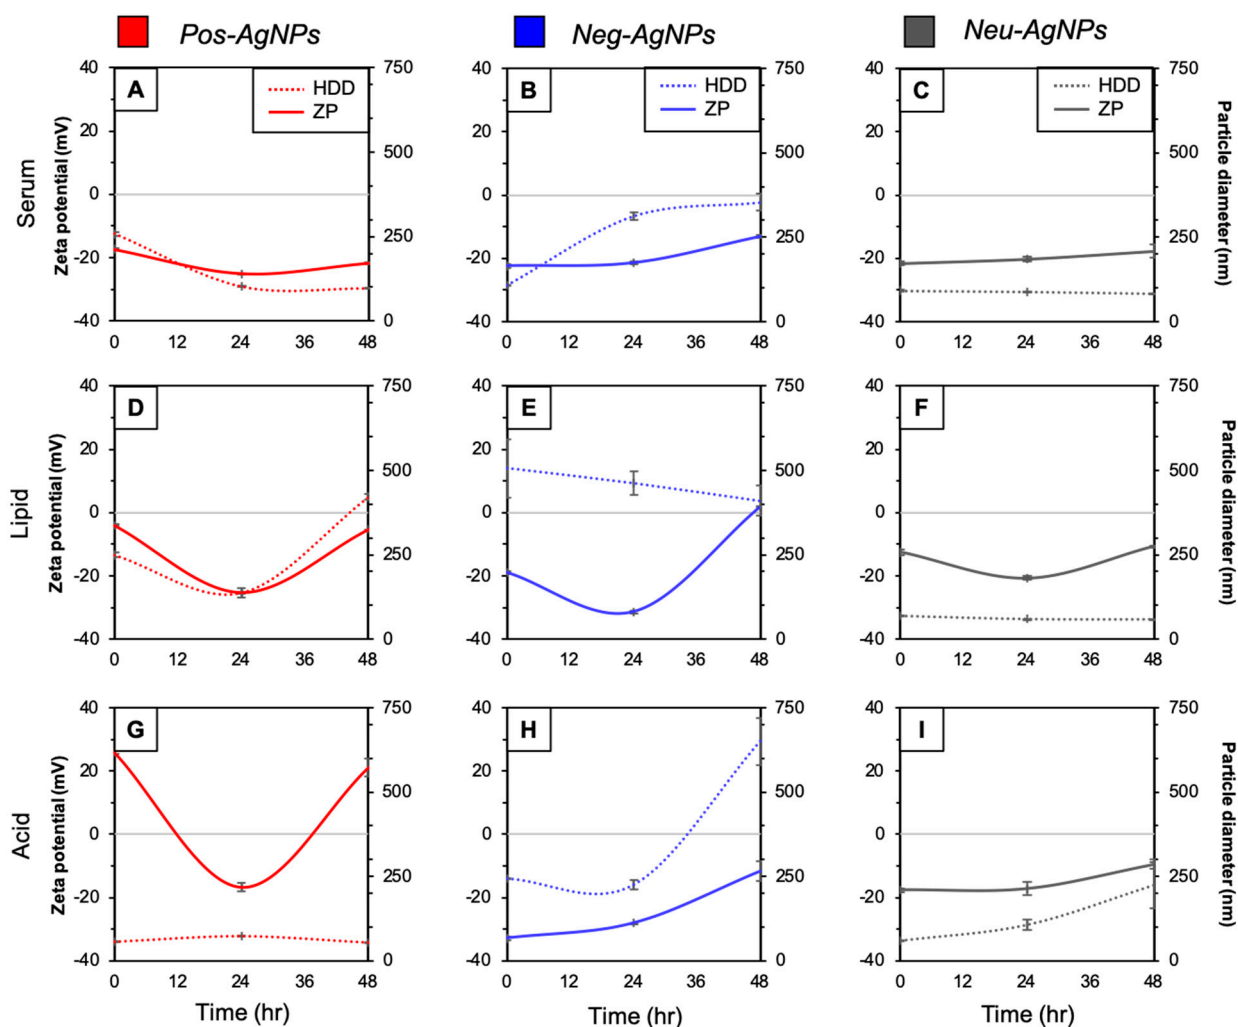

**Figure S1.** Trends in AgNP HDD and ZP over time showed significant changes among stabilizing agents charge, but not incubation scenario. No trends were found in the Neg-AgNPs (B,E,H) plots.

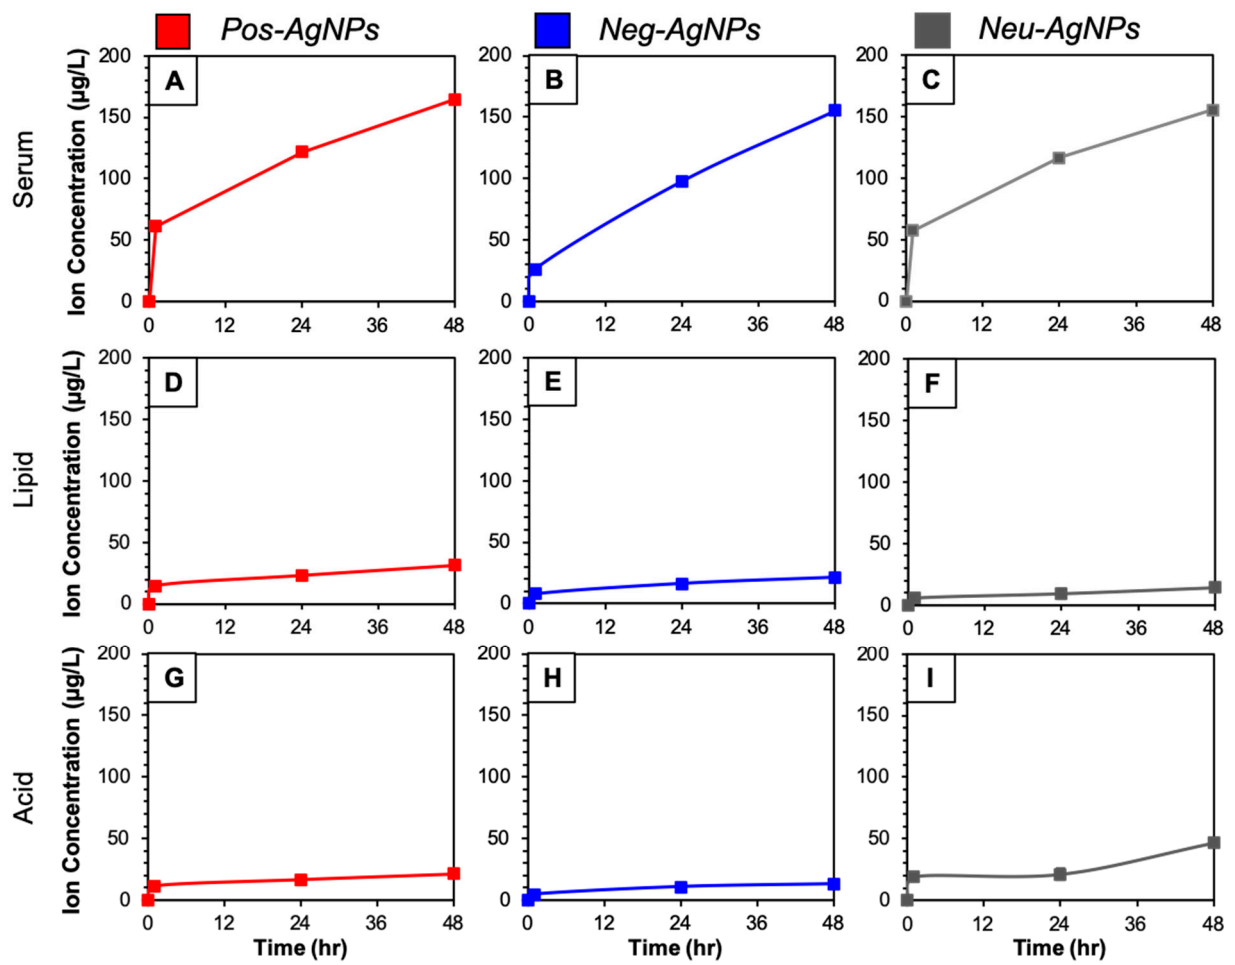

**Figure S2.** After biotransformation, silver ion dissolution was measured utilizing ICP-MS at 0, 24, and 48 h. Serum protein absorption (A,B&C) produced the highest concentration of dissociated silver for all three time periods tested, which is in contrast to (B) lipid and (C) acid which had negligible dissolution in comparison.

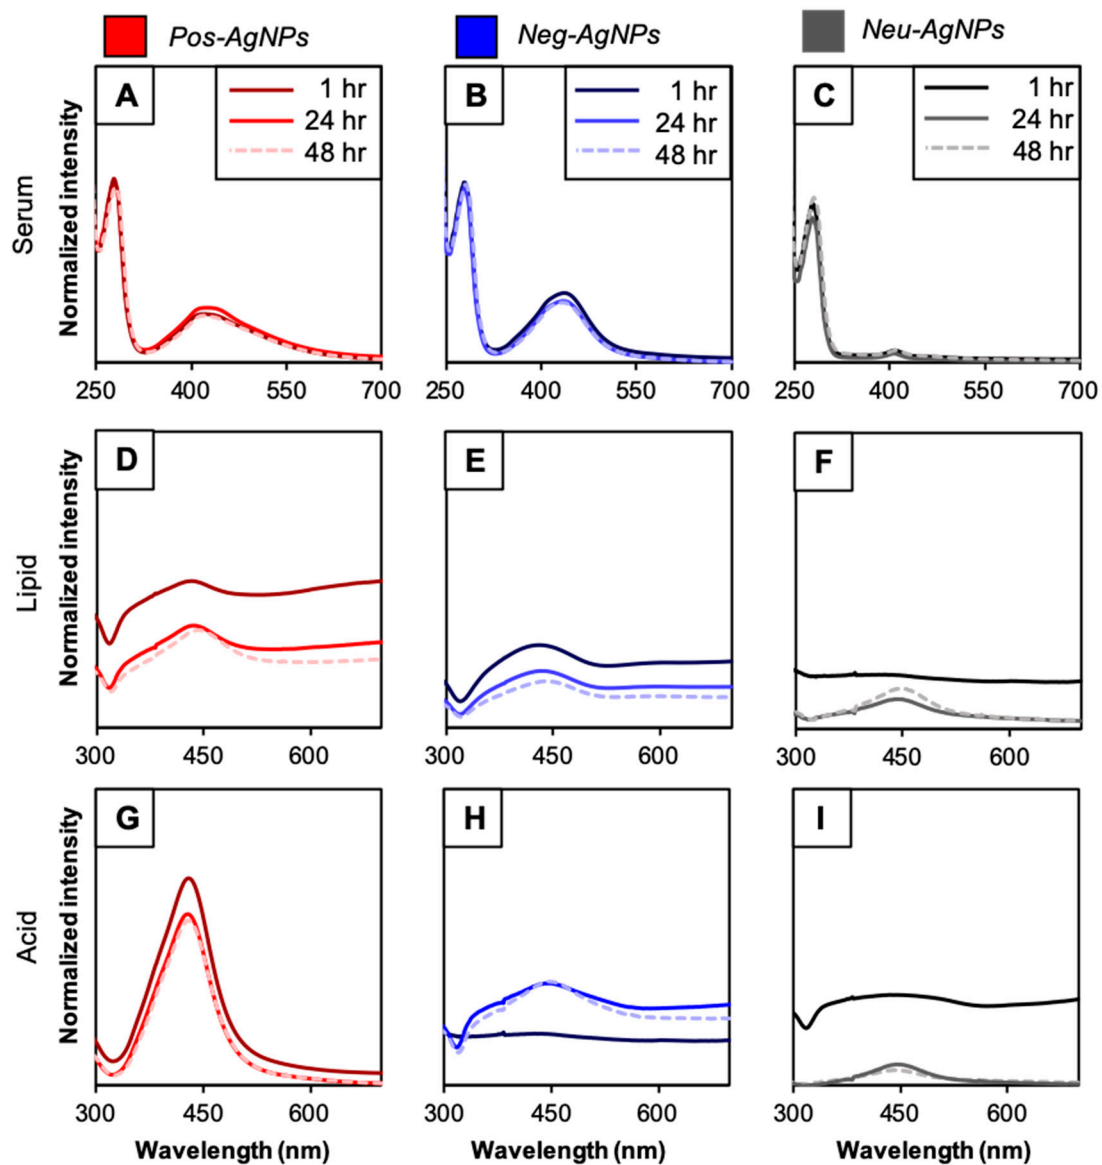

**Figure S3.** UV-Vis absorbance spectra monitored at 1, 24, and 48 h. timepoints post-incubation. AgNPs change over time after serum incubation indicated by increased absorption compared to the other incubation scenarios (D-I). Neu-AgNPs (F) and digested Neg-AgNPs (H) exhibited a decrease in absorbance. .
